# Supplementary material for: Early Molecular Responses of Tomato to Combined Moderate Water Stress and Tomato Red Spider Mite Tetranychus evansi Attack
Source: PubMed Central journal article supplement (PMC7570366; doi:10.3390/plants9091131), 2020-08-31
Supplement: plants-09-01131-s001.pdf [file plants-09-01131-s001.pdf]

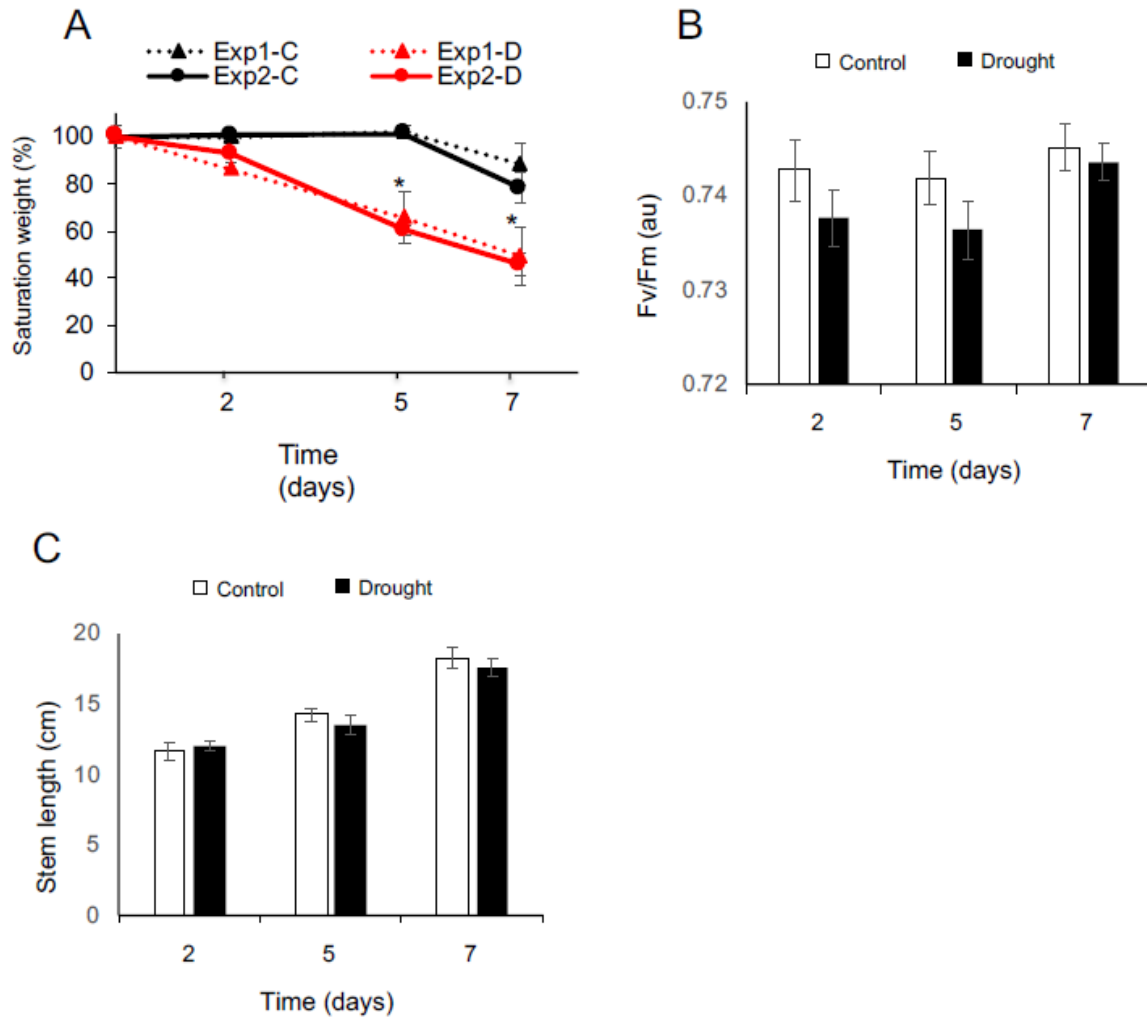

**Figure S1.** Tomato characterization during moderate drought imposition. (A) saturation weight measurements in moderate drought tomato experiment 1 (Exp1, dotted lines) and experiment 2 (Exp2, continuous lines) during the water stress imposition in control plants (black line) and drought stressed plants (red line), (B) Stem growth (stem length) and (C) photosynthetic activity (Fv/Fm) in drought stressed plants after two, five and seven days of water withdrawal. Data are mean  $\pm$  SE of seven replicates/treatment from two independent experiments. Asterisk indicates significant differences of each treatment respect its control (Student's t-test,  $p < 0.05$ ).

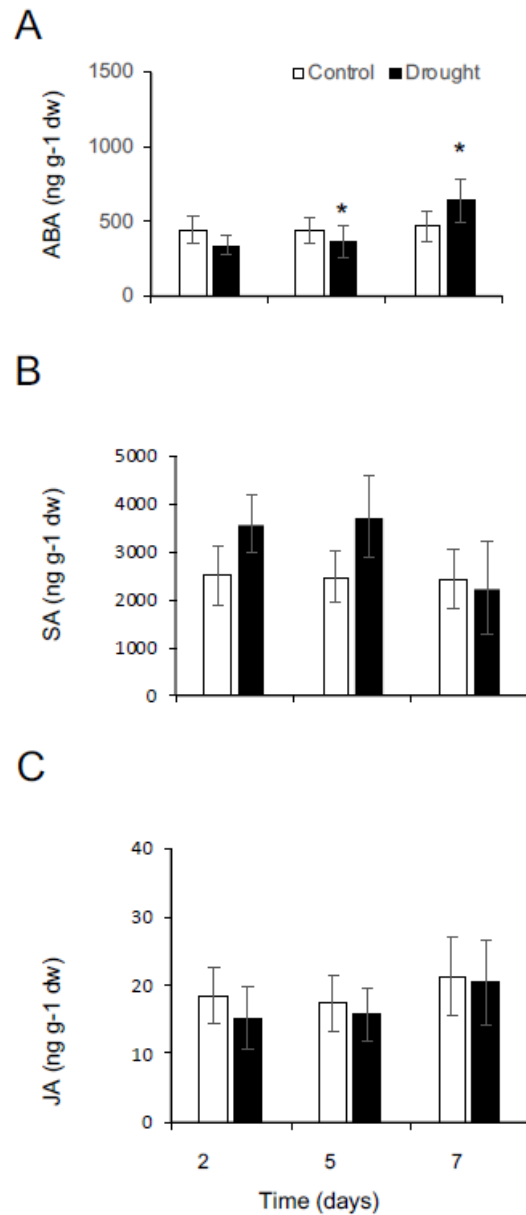

**Figure S2.** Hormone profiling of tomato plants under moderate water stress conditions. (A) ABA, (B) SA and, (C) JA endogenous levels in well-watered plants (Control) and drought-stressed plants (Drought) at two, five and seven days after water withdrawal. Data are mean  $\pm$  SE of seven replicates/treatment from two independent experiments. Plant treatment was analysed by two-way ANOVA considering the experiment replica as a fixed factor. Asterisk indicates significant differences of each treatment respect its control ( $p < 0.05$ ).

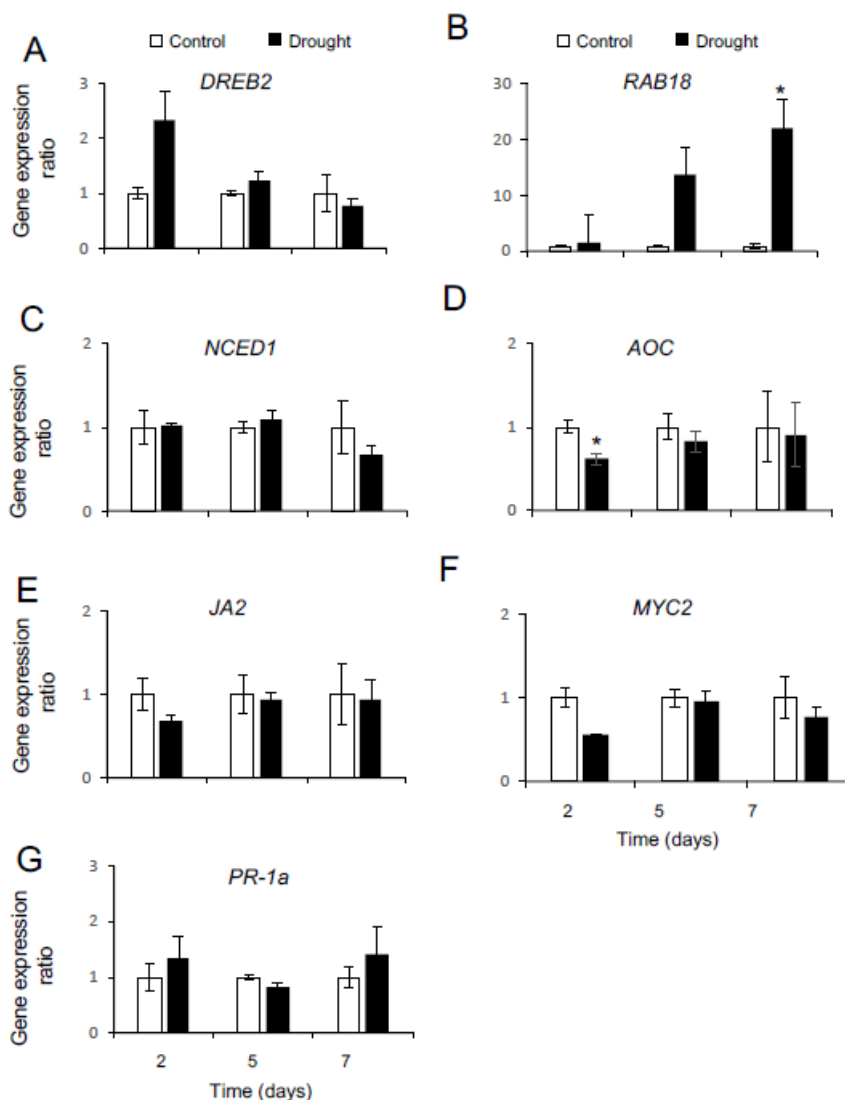

**Figure S3.** Stress-marker gene expression analysis of tomato plants under moderate drought stress. The expression of (A) DREB2, (B) RAB18, (C) NCED1, (D) AOC, (E) MYC2, (F) JA2, and (G) PR-1a genes were analysed in well-watered plants (Control) and drought-stressed plants (Drought) at two, five and seven days after water withdrawal. Gene expression calculated as normalized relative quantities (NRQ) values are represented as gene expression ratio compared to its control sample for each time point. Data are mean  $\pm$  SE of seven replicates/treatment from two independent experiments. Plant treatment was analysed by two-tailed Student's t-test. Asterisk indicates significant differences of each treatment respect its control ( $p < 0.05$ ).

**Table S1.** Detailed results of the statistical analysis for phytohormones and gene expression during water stress imposition. A) ANOVA analysis (drought and replica as fixed factors) for phytohormones data. Data were  $\log_{10}(x)$  transformed. In bold the significant factors ( $p < 0.05$ ). B) Student's t-test analysis for gene expression data. Data were normalized with respect to their corresponding control within each replica. In bold the significant factors ( $p < 0.05$ , adjusted for not equal variances). Degrees of freedom—df, p value— $p$ , t-Student statistic value— $t$  and F-statistic value— $F$  are indicated.

| A)  |    |         |      |              |         |      |              |                 |      |       |
|-----|----|---------|------|--------------|---------|------|--------------|-----------------|------|-------|
|     |    | Drought |      |              | Replica |      |              | Drought*Replica |      |       |
|     |    | F       | df   | $p$          | F       | df   | $p$          | F               | df   | $p$   |
| ABA | 2d | 2.926   | 1,10 | 0.118        | 91.553  | 1,10 | <b>0.000</b> | 4.145           | 1,10 | 0.069 |
|     | 5d | 8.023   | 1,10 | <b>0.018</b> | 216.718 | 1,10 | <b>0.000</b> | 0.129           | 1,10 | 0.727 |
|     | 7d | 20.081  | 1,10 | <b>0.001</b> | 267.959 | 1,10 | <b>0.000</b> | 0.789           | 1,10 | 0.395 |

|    |    |       |      |       |        |      |              |       |      |       |
|----|----|-------|------|-------|--------|------|--------------|-------|------|-------|
| SA | 2d | 3.752 | 1,10 | 0.081 | 15.937 | 1,10 | <b>0.003</b> | 0.086 | 1,10 | 0.775 |
|    | 5d | 4.138 | 1,10 | 0.069 | 19.094 | 1,10 | <b>0.001</b> | 0.428 | 1,10 | 0.528 |
|    | 7d | 1.087 | 1,10 | 0.322 | 11.963 | 1,10 | <b>0.006</b> | 0.023 | 1,10 | 0.882 |
| JA | 2d | 3.563 | 1,10 | 0.088 | 28.411 | 1,10 | <b>0.000</b> | 0.064 | 1,10 | 0.806 |
|    | 5d | 1.135 | 1,10 | 0.312 | 77.164 | 1,10 | <b>0.000</b> | 0.380 | 1,10 | 0.552 |
|    | 7d | 0.026 | 1,10 | 0.876 | 43.181 | 1,10 | <b>0.000</b> | 0.096 | 1,10 | 0.764 |

**B)**

|              | 2 days |    |              | 5 days |    |       | 7 days |    |              |
|--------------|--------|----|--------------|--------|----|-------|--------|----|--------------|
|              | t      | df | p            | t      | df | p     | t      | df | p            |
| <b>Genes</b> |        |    |              |        |    |       |        |    |              |
| DREB2        | -0.964 | 6  | 0.388        | -1.706 | 6  | 0.163 | 0.969  | 6  | 0.402        |
| RAB18        | -3.111 | 6  | 0.053        | -2.108 | 6  | 0.124 | -4.211 | 6  | <b>0.024</b> |
| NCED1        | -1.186 | 6  | 0.317        | -0.371 | 6  | 0.733 | 0.541  | 6  | 0.626        |
| AOC          | 3.256  | 6  | <b>0.044</b> | -0.152 | 6  | 0.889 | -0.924 | 6  | 0.423        |
| MYC2         | 2.760  | 6  | 0.063        | 0.503  | 6  | 0.646 | 1.298  | 6  | 0.283        |
| JA2          | 2.990  | 6  | 0.054        | -0.286 | 6  | 0.793 | -0.758 | 6  | 0.504        |
| PR1a         | 1.211  | 6  | 0.306        | -0.391 | 6  | 0.722 | -0.001 | 6  | 0.999        |

**Table S2.** Detailed results of the statistical ANOVA analysis for phytohormones and gene expression during the stress combination. **A)** ANOVA analysis for phytohormones. Drought and *T. evansi* treatments, and the experiment replica were considered as fixed factors. Data were log<sub>10</sub>(x) transformed. All factors' interactions were studied but only Drought\**T. evansi* interaction is shown. **B)** ANOVA analysis for gene expression. Drought and *T. evansi* treatment were considered as fixed factors. Data were normalized with respect to their corresponding control within each replica. In bold the significant factors ( $p < 0.05$ ). Degrees of freedom –df, p value– $p$ , and F-statistic value–F are indicated.

**A)**

|     |    | Drought |      |              | <i>T. evansi</i> |      |              | Drought* <i>T. evansi</i> |      |              | Replica |      |              |
|-----|----|---------|------|--------------|------------------|------|--------------|---------------------------|------|--------------|---------|------|--------------|
|     |    | F       | df   | p            | F                | df   | p            | F                         | df   | p            | F       | df   | p            |
| ABA | 1h | 34.800  | 1,20 | <b>0.000</b> | 2.167            | 1,20 | 0.157        | 1.704                     | 1,20 | 0.207        | 378.242 | 1,20 | <b>0.000</b> |
|     | 3h | 14.946  | 1,20 | <b>0.001</b> | 0.282            | 1,20 | 0.601        | 0.514                     | 1,20 | 0.482        | 114.391 | 1,20 | <b>0.000</b> |
|     | 8h | 2.410   | 1,20 | 0.136        | 0.593            | 1,20 | 0.450        | 0.257                     | 1,20 | 0.618        | 73.256  | 1,20 | <b>0.000</b> |
| SA  | 1h | 0.389   | 1,20 | 0.540        | 0.084            | 1,20 | 0.774        | 1.039                     | 1,20 | 0.320        | 15.494  | 1,20 | <b>0.001</b> |
|     | 3h | 0.527   | 1,20 | 0.476        | 22.212           | 1,20 | <b>0.000</b> | 15.585                    | 1,20 | <b>0.001</b> | 1.238   | 1,20 | 0.279        |
|     | 8h | 0.081   | 1,20 | 0.779        | 21.575           | 1,20 | <b>0.000</b> | 0.000                     | 1,20 | 0.983        | 13.586  | 1,20 | <b>0.001</b> |
| JA  | 1h | 1.077   | 1,20 | 0.312        | 8.912            | 1,20 | <b>0.007</b> | 0.642                     | 1,20 | 0.432        | 89.280  | 1,20 | <b>0.000</b> |
|     | 3h | 0.411   | 1,20 | 0.529        | 3.441            | 1,20 | 0.078        | 2.081                     | 1,20 | 0.165        | 304.401 | 1,20 | <b>0.000</b> |
|     | 8h | 0.124   | 1,20 | 0.728        | 1.177            | 1,20 | 0.291        | 0.794                     | 1,20 | 0.384        | 119.745 | 1,20 | <b>0.000</b> |

**B)**

|       |    | Drought |      |              | <i>T. evansi</i> |      |              | Drought* <i>T. evansi</i> |      |              |
|-------|----|---------|------|--------------|------------------|------|--------------|---------------------------|------|--------------|
|       |    | F       | df   | p            | F                | df   | p            | F                         | df   | p            |
| DREB2 | 1h | 0.389   | 1,12 | 0.544        | 2.361            | 1,12 | 0.150        | 0.440                     | 1,12 | 0.520        |
|       | 3h | 0.513   | 1,12 | 0.487        | 0.158            | 1,12 | 0.698        | 0.541                     | 1,12 | 0.476        |
|       | 8h | 13.610  | 1,12 | <b>0.003</b> | 0.638            | 1,12 | 0.440        | 14.068                    | 1,12 | <b>0.003</b> |
| RAB18 | 1h | 21.483  | 1,12 | <b>0.001</b> | 0.756            | 1,12 | 0.401        | 0.030                     | 1,12 | 0.865        |
|       | 3h | 41.789  | 1,12 | <b>0.000</b> | 8.802            | 1,12 | <b>0.012</b> | 3.072                     | 1,12 | 0.105        |
|       | 8h | 68.623  | 1,12 | <b>0.000</b> | 41.531           | 1,12 | <b>0.000</b> | 0.531                     | 1,12 | 0.480        |
| NCED1 | 1h | 0.149   | 1,12 | 0.706        | 0.147            | 1,12 | 0.708        | 0.005                     | 1,12 | 0.947        |
|       | 3h | 5.296   | 1,12 | <b>0.040</b> | 0.347            | 1,12 | 0.567        | 0.235                     | 1,12 | 0.636        |
|       | 8h | 0.191   | 1,12 | 0.670        | 1.578            | 1,12 | 0.233        | 0.811                     | 1,12 | 0.386        |
| AOC   | 1h | 0.639   | 1,12 | 0.439        | 0.180            | 1,12 | 0.679        | 0.119                     | 1,12 | 0.736        |
|       | 3h | 4.285   | 1,12 | 0.061        | 0.077            | 1,12 | 0.786        | 0.180                     | 1,12 | 0.679        |
|       | 8h | 28.501  | 1,12 | <b>0.000</b> | 3.172            | 1,12 | 0.100        | 1.742                     | 1,12 | 0.212        |
| MYC2  | 1h | 0.036   | 1,12 | 0.853        | 0.001            | 1,12 | 0.978        | 0.832                     | 1,12 | 0.380        |
|       | 3h | 1.479   | 1,12 | 0.247        | 4.086            | 1,12 | 0.066        | 3.304                     | 1,12 | 0.094        |
|       | 8h | 0.210   | 1,12 | 0.655        | 0.646            | 1,12 | 0.437        | 1.492                     | 1,12 | 0.245        |
| JA2   | 1h | 0.635   | 1,12 | 0.441        | 0.343            | 1,12 | 0.569        | 0.154                     | 1,12 | 0.702        |
|       | 3h | 4.069   | 1,12 | 0.067        | 0.045            | 1,12 | 0.835        | 0.198                     | 1,12 | 0.664        |
|       | 8h | 32.578  | 1,12 | <b>0.000</b> | 3.277            | 1,12 | 0.095        | 1.879                     | 1,12 | 0.196        |
| PR1a  | 1h | 0.001   | 1,12 | 0.976        | 0.012            | 1,12 | 0.913        | 0.001                     | 1,12 | 0.974        |

|           |       |      |       |       |      |              |         |      |              |
|-----------|-------|------|-------|-------|------|--------------|---------|------|--------------|
| <b>3h</b> | 0.012 | 1,12 | 0.913 | 6.424 | 1,12 | <b>0.026</b> | 277.366 | 1,12 | <b>0.000</b> |
| <b>8h</b> | 1.395 | 1,12 | 0.260 | 0.725 | 1,12 | 0.411        | 0.713   | 1,12 | 0.415        |

**Table S3.** Annotation of mass chromatographic features in initial drought imposition (annotation level: 1, matched against authentic standard; 2, putative annotation by matching mass spectra with public libraries; 3, tentative annotation by partial matching of mass spectra with public libraries). Quantified ions are highlighted in bold. nd, not determined. Mass to charge ratio—*mz* and retention time in seconds—*rt*, are indicated.

| Annotation                                   | <i>mz</i>      | <i>rt</i> [s] | ion type                                                                                         | Annotation level |
|----------------------------------------------|----------------|---------------|--------------------------------------------------------------------------------------------------|------------------|
| oleoylcarnitine glucoside                    | <b>588.390</b> | <b>965.0</b>  | [M + H] + 587.382<br>[M + H - C6H10O5] + 587.382<br>[M + H - H2O] + 103.064<br>[M + H] + 103.064 | 2                |
|                                              | <b>142</b>     | <b>66</b>     |                                                                                                  |                  |
|                                              | 426.333        | 965.0         |                                                                                                  |                  |
|                                              | 544            | 66            |                                                                                                  |                  |
|                                              | 86.0564        | 976.7         |                                                                                                  |                  |
|                                              | 556            | 08            |                                                                                                  |                  |
| Benzyl O-[arabinofuranosyl-(1->6)-glucoside] | <b>104.071</b> | <b>978.0</b>  | [M + H] + 402.156                                                                                | 2                |
|                                              | <b>781</b>     | <b>9</b>      |                                                                                                  |                  |
|                                              | <b>403.164</b> | <b>578.9</b>  |                                                                                                  |                  |
|                                              | <b>47</b>      | <b>025</b>    |                                                                                                  |                  |
|                                              | 91.0554        | 578.4         |                                                                                                  |                  |
|                                              | 303            | 88            |                                                                                                  |                  |
|                                              | 109.029        | 578.4         |                                                                                                  |                  |
|                                              | 845            | 82            |                                                                                                  |                  |
|                                              | 115.040        | 578.4         |                                                                                                  |                  |
|                                              | 556            | 81            |                                                                                                  |                  |
|                                              | 133.058        | 578.4         |                                                                                                  |                  |
|                                              | 687            | 8             |                                                                                                  |                  |
|                                              | 253.110        | 578.4         |                                                                                                  |                  |
|                                              | 004            | 87            |                                                                                                  |                  |
|                                              | 295.104        | 578.4         |                                                                                                  |                  |
|                                              | 284            | 81            |                                                                                                  |                  |
| 420.187                                      | 578.4          |               |                                                                                                  |                  |
| 394                                          | 88             |               |                                                                                                  |                  |
| 425.145                                      | 578.4          |               |                                                                                                  |                  |
| 315                                          | 88             |               |                                                                                                  |                  |
| 441.117                                      | 578.4          |               |                                                                                                  |                  |
| 763                                          | 81             |               |                                                                                                  |                  |
| Choline                                      | <b>104.108</b> | <b>482.6</b>  | nd                                                                                               | 2                |
|                                              | <b>154</b>     | <b>835</b>    |                                                                                                  |                  |
|                                              | 97.0297        | 578.4         |                                                                                                  |                  |
| Phosphatidyl choline phospholipid #1         | <b>526</b>     | <b>88</b>     | [M + H - H2O] + 713.548                                                                          | 3                |
|                                              | <b>696.545</b> | <b>59.60</b>  |                                                                                                  |                  |
|                                              | <b>366</b>     | <b>9</b>      |                                                                                                  |                  |
| Phosphatidyl choline phospholipid #2         | 184.07         | 59.60         | [M + H - H2O] + 713.548<br>[M + H - C6H10O5] + 512.298                                           | 3                |
|                                              | 335.269        | 59.60         |                                                                                                  |                  |
|                                              | 9              | 9             |                                                                                                  |                  |
| Phosphatidyl Serine phospholipid             | <b>696.545</b> | <b>174.8</b>  | [M + H] + 725.445                                                                                | 3                |
|                                              | <b>771</b>     | <b>61</b>     |                                                                                                  |                  |
|                                              | 351.254        | 175.9         |                                                                                                  |                  |
| Linalool 3,7-oxide beta-primeveroside        | 658            | 174.6         | [M + H] +                                                                                        | 2                |
|                                              | 262.279        | 3             |                                                                                                  |                  |
|                                              | <b>726.453</b> | <b>87.70</b>  |                                                                                                  |                  |
|                                              | <b>421</b>     | <b>9</b>      |                                                                                                  |                  |
| Linalool 3,7-oxide beta-primeveroside        | <b>465.258</b> | <b>517.3</b>  | [M + H] +                                                                                        | 2                |
|                                              | <b>235</b>     | <b>61</b>     |                                                                                                  |                  |
|                                              | 311.259        | 127           |                                                                                                  |                  |
|                                              | 447.250        | 874           |                                                                                                  |                  |

|                                                  |                |              |                                            |          |
|--------------------------------------------------|----------------|--------------|--------------------------------------------|----------|
| <b>L-lyxo-phytosphingosine #1</b>                | <b>318.301</b> | <b>91.96</b> | <b>[M + H] + 317.294</b>                   | <b>2</b> |
|                                                  | <b>664</b>     | <b>3</b>     |                                            |          |
|                                                  | 274.275        | 91.95        | [M + H - C <sub>4</sub> H <sub>8</sub> ] + |          |
|                                                  | 582            | 8            | 329.331                                    |          |
|                                                  | 123.404        | 90.88        | [M + H] + 122.396                          |          |
|                                                  | 008            | 6            |                                            |          |
| <b>octanal</b>                                   | <b>274.275</b> | <b>190.8</b> | nd                                         |          |
|                                                  | <b>564</b>     | <b>43</b>    |                                            |          |
| <b>gingerol</b>                                  | <b>323.222</b> | <b>194.3</b> | [M + H] +                                  | <b>2</b> |
|                                                  | <b>828</b>     | <b>07</b>    |                                            |          |
| <b>fatty acid</b>                                | <b>275.202</b> | <b>109.1</b> | [M + H] + 274.196                          | <b>3</b> |
|                                                  | <b>357</b>     | <b>84</b>    |                                            |          |
| <b>Glutamine</b>                                 | <b>147.077</b> | <b>1011.</b> | [M + H] +                                  |          |
|                                                  | <b>667</b>     | <b>27</b>    |                                            |          |
|                                                  | 130.067        | 1011.        | [M - NH <sub>3</sub> ] +                   |          |
|                                                  |                | 27           |                                            |          |
|                                                  | 84.064         | 1011.        |                                            |          |
|                                                  |                | 27           |                                            |          |
| <b>Diacylglycerol</b>                            | <b>591.498</b> | <b>408.5</b> | [M + H] + 590.493                          | <b>3</b> |
|                                                  | <b>776</b>     | <b>985</b>   |                                            |          |
|                                                  | 573.433        |              | [M - H <sub>2</sub> O] +                   |          |
|                                                  | 313.28         |              |                                            |          |
| <b>Betaine</b>                                   | <b>118.087</b> | <b>698.2</b> | nd                                         | <b>2</b> |
|                                                  | <b>852</b>     | <b>08</b>    |                                            |          |
| <b>feruloyl glucose</b>                          | <b>374.145</b> | <b>648.6</b> | [M + H + NH <sub>3</sub> ] +               | <b>2</b> |
|                                                  | <b>347</b>     | <b>44</b>    |                                            |          |
|                                                  | 379.106        | 648.0        | [M + Na] + 356.115                         |          |
|                                                  | 336            | 22           |                                            |          |
| 193.14                                           |                |              |                                            |          |
| <b>Isopentyl gentiobioside</b>                   | <b>430.229</b> | <b>597.9</b> | [M + H + NH <sub>3</sub> ] +               | <b>2</b> |
|                                                  | <b>259</b>     | <b>36</b>    |                                            |          |
|                                                  | 435.183        | 598.9        | [M + Na] + 412.193                         |          |
|                                                  | 199            | 84           |                                            |          |
|                                                  | 451.154        | 597.9        | [M + K] + 412.193                          |          |
| 387                                              | 35             |              |                                            |          |
| <b>nicotinate beta-D-ribonucleotide</b>          | <b>336.063</b> | <b>537.8</b> | [M + H] + 335.054                          | <b>2</b> |
|                                                  | <b>185</b>     | <b>43</b>    |                                            |          |
| <b>lucuminic acid</b>                            | <b>464.176</b> | <b>498.9</b> | [M + H + NH <sub>3</sub> ] +               | <b>2</b> |
|                                                  | <b>084</b>     | <b>69</b>    |                                            |          |
|                                                  | 485.105        | 499.9        | [M + K] + 446.142                          |          |
|                                                  | 438            | 97           |                                            |          |
|                                                  | 153.056        | 499.9        |                                            |          |
| 181                                              | 86             |              |                                            |          |
| <b>(S)-5'-Deoxy-5'-(methylsulfinyl)adenosine</b> | <b>314.093</b> | <b>518.3</b> | nd                                         | <b>2</b> |
|                                                  | <b>684</b>     | <b>94</b>    |                                            |          |
|                                                  | 136.065        | 518.3        | adenine moiety                             |          |
|                                                  | 949            | 96           |                                            |          |
| <b>kaempferol hexoside deoxyhexoside</b>         | <b>595.168</b> | <b>592.7</b> | nd                                         | <b>1</b> |
|                                                  | <b>464</b>     | <b>21</b>    |                                            |          |
|                                                  | 287.057        | 592.7        |                                            |          |
|                                                  | 074            | 22           |                                            |          |
|                                                  | 449.109        | 592.7        |                                            |          |
| 487                                              | 22             |              |                                            |          |
| <b>L-lyxo-phytosphingosine #2</b>                | <b>318.299</b> | <b>186.6</b> | nd                                         | <b>2</b> |
|                                                  | <b>626</b>     | <b>8</b>     |                                            |          |
|                                                  | 140.081        | 187.1        |                                            |          |
|                                                  | 696            | 96           |                                            |          |
| <b>ornithine moiety</b>                          | <b>133.101</b> | <b>142.5</b> | nd                                         | <b>3</b> |
|                                                  | <b>825</b>     | <b>01</b>    |                                            |          |
| <b>alkaloid</b>                                  | <b>476.285</b> | <b>622.3</b> | nd                                         | <b>3</b> |
|                                                  |                | <b>75</b>    |                                            |          |
| <b>guanine</b>                                   | <b>152.059</b> | <b>584.0</b> | nd                                         | <b>1</b> |
|                                                  | <b>342</b>     | <b>42</b>    |                                            |          |

|                                                                                                    |                                                                                     |                            |                                                    |       |
|----------------------------------------------------------------------------------------------------|-------------------------------------------------------------------------------------|----------------------------|----------------------------------------------------|-------|
| disaccharide                                                                                       | 365.106<br>551<br>162.077<br>76                                                     | 1046.<br>22<br>1051.<br>34 | [M + Na] + 342.118                                 | 2     |
| polymethoxylated flavone                                                                           | 361.091<br>262                                                                      | 661.5<br>015               | [M + H] + 360.085                                  | 3     |
| maltose                                                                                            | 409.095<br>047                                                                      | 953.2<br>95                | [M - H + NaCOOH]<br>- 342.117                      | 2     |
| pimpinellin                                                                                        | 245.043<br>503                                                                      | 977.8<br>29                | [M - H] - 246.051                                  | 2     |
| 2-Dodecylbenzenesulfonic acid                                                                      | 325.185<br>14<br>68.9974<br>1<br>112.985<br>972<br>297.152<br>415<br>311.169<br>795 | 73.33<br>35                | [M - H] - 326.192                                  | 2     |
| pyroglutamic                                                                                       | 128.036<br>542                                                                      | 1006.<br>08                | nd                                                 | 1     |
| benzamide                                                                                          | 120.046<br>797                                                                      | 166.3<br>76                | [M - H] - 121.054                                  | 2     |
| cyanidin glucoside                                                                                 | 447.093<br>937                                                                      | 358.0<br>09                | nd                                                 | 1     |
| O-alpha-Glucopyranosyl-(1-4)-O-alpha-xylopyranosyl-(1-4)-O-alpha-xylopyranosyl-(1-4)-glucopyranose | 605.193<br>3                                                                        | 1338.<br>74                | nd                                                 | 2     |
| purine                                                                                             | 119.036<br>041                                                                      | 812.2<br>705               | nd                                                 | 3     |
| synapoyl glucose                                                                                   | 385.114<br>155<br>205.051<br>4                                                      | 206.2<br>26<br>206.2<br>39 | [M - H] - 386.122<br>[M - H - H2O] -<br>224.071    | 2     |
| (2S)-2-Butanol O-[b-D-Apiofuranosyl-(1->6)-b-D-glucopyranoside                                     | 367.159<br>858<br>235.117<br>691                                                    | 600.1<br>02<br>599.0<br>82 | [M - H] - 368.167<br>[M - H - C5H8O4] -<br>368.167 | 2     |
| 7-Methoxy-2-methylisoflavone                                                                       | 265.094<br>83                                                                       | 880.0<br>07                | nd                                                 | 2     |
| Malondialdehyde                                                                                    | 71.0161<br>559                                                                      | 704.6<br>405               | nd                                                 | 2     |
| Inositol cyclic phosphate                                                                          | 241.014<br>144                                                                      | 938.3<br>61                | nd                                                 | 2     |
| Unknown pentoside                                                                                  | 229.109<br>01                                                                       | 631.3<br>76                | [M - H - C5H8O4]<br>- 362.159                      | 3, nd |
| Uridine diphosphate-N-acetylglucosamine                                                            | 606.075<br>026                                                                      | 1294.<br>19                | [M - H] - 607.082                                  | 2     |
| O-Caffeoylquinic acid #1                                                                           | 353.088<br>102                                                                      | 835.9<br>085               | nd                                                 | 2     |
| O-Caffeoylquinic acid #2                                                                           | 353.087<br>878                                                                      | 916.8<br>16                | nd                                                 | 2     |
| Succinic acid semialdehyde                                                                         | 101.025<br>621<br>73.048                                                            | 817.8<br>38<br>833.4       | nd                                                 | 2     |
| peroxynitrite/nitrate                                                                              | 61.9902<br>408                                                                      | 148.9<br>055               | nd                                                 | 3     |

**Table S4.** Annotation of significantly-altered mass chromatographic features in the experiments involving concurring spider mite infestation and drought (annotation level: 1, matched against authentic standard; 2, putative annotation by matching mass spectra with public libraries; 3, tentative annotation by partial matching of mass spectra with public libraries). Quantified ions are highlighted in bold. nd, not determined. Mass to charge ratio  $-m/z$  and retention time in seconds— $rt$ , are indicated.

| Annotation                                     | <i>mz</i>         | <i>rt</i> [s]   | ion type                                                           | Annotation level |
|------------------------------------------------|-------------------|-----------------|--------------------------------------------------------------------|------------------|
| <b>Glycerophosphocholine</b>                   | <b>258.111749</b> | <b>1028.59</b>  | <b>[M + H] + 257.104</b>                                           | <b>2</b>         |
|                                                | 104.10798         | 1028.585        |                                                                    |                  |
|                                                | 184.074999        | 1028.585        |                                                                    |                  |
| <b>Phosphatidyl ethanolamine (PE)</b>          | <b>770.59156</b>  | <b>79.019</b>   | <b>[M + H] + 769.579</b>                                           | <b>3</b>         |
|                                                | 335.25977         | 81.101          |                                                                    |                  |
|                                                | 563.46906         | 79.0395         | [M + H - C <sub>2</sub> H <sub>4</sub> ] + 590.495                 |                  |
|                                                | 567.439617        | 80.0615         | [M + Na] + 544.451                                                 |                  |
|                                                | 585.45095         | 81.109          |                                                                    |                  |
|                                                | 600.440986        | 80.954          | [M + H - C <sub>2</sub> H <sub>4</sub> ] + 627.466                 |                  |
|                                                | 613.482474        | 81.0035         | [M + Na] + 590.495                                                 |                  |
|                                                | 628.475041        | 80.961          | [M + H] + 627.466                                                  |                  |
|                                                | 742.54983         | 79.0305         | [M + H - C <sub>2</sub> H <sub>4</sub> ] + 769.579                 |                  |
|                                                | 762.487567        | 81.112          |                                                                    |                  |
|                                                | 764.533071        | 79.9185         |                                                                    |                  |
| <b>Anthranilic acid</b>                        | <b>138.056529</b> | <b>751.491</b>  | <b>[M + H] + 137.05</b>                                            | <b>1</b>         |
|                                                | 92.0505177        | 751.91          | [M + H - HCOOH] + 137.05                                           |                  |
|                                                | 94.0663011        | 751.6895        | [M + H - CO <sub>2</sub> ] + 137.05                                |                  |
| <b>Diterpenoid glycoside</b>                   | <b>515.321924</b> | <b>155.484</b>  | <b>[M + H] + 514.318</b>                                           | <b>3</b>         |
|                                                | 261.222667        | 155.4895        | [M + H - C <sub>2</sub> H <sub>4</sub> ] + 288.254                 |                  |
|                                                | 335.259657        | 155.4895        | [M - H <sub>2</sub> O] + 352.2694                                  |                  |
|                                                | 353.269484        | 155.4895        | [M + H - C <sub>6</sub> H <sub>10</sub> O <sub>5</sub> ] + 514.318 |                  |
| <b>Linoleoyl glycerophosphocholine</b>         | <b>520.340134</b> | <b>530.146</b>  | <b>[M + H] + 519.333</b>                                           | <b>2</b>         |
|                                                | 502.324566        | 530.1465        | [M + H - H <sub>2</sub> O] + 519.333                               |                  |
| <b>Octylamine #1</b>                           | <b>130.160162</b> | <b>66.5</b>     | nd                                                                 | <b>3</b>         |
| <b>L-proline</b>                               | <b>116.072152</b> | <b>797.242</b>  | <b>[M + H] +</b>                                                   | <b>1</b>         |
|                                                | 70.0664826        | 797.538         | [M + H - HCOOH] + 69.0593                                          |                  |
| <b>Phosphatidylserine (PS)</b>                 | <b>554.344171</b> | <b>573.223</b>  |                                                                    | <b>2</b>         |
|                                                | 534.319881        | 572.1815        |                                                                    |                  |
| <b>Glucocerebroside-like</b>                   | <b>714.552105</b> | <b>173.863</b>  | <b>[M + H] + 713.546</b>                                           | <b>3</b>         |
|                                                | 552.500286        | 173.863         | [M + H - C <sub>6</sub> H <sub>10</sub> O <sub>5</sub> ] + 713.546 |                  |
|                                                | 696.546507        | 174.238         | [M + H - H <sub>2</sub> O] + 713.546                               |                  |
| <b>Glycosylated steroid alkaloid tentative</b> | <b>594.403809</b> | <b>958.885</b>  | <b>[M + H] + 593.397</b>                                           | <b>3</b>         |
|                                                | 295.104998        | 958.204         | [M + H - C <sub>6</sub> H <sub>10</sub> O <sub>5</sub> ] + 456.15  |                  |
|                                                | 428.351826        | 960.2655        | [M + H] + 427.343                                                  |                  |
|                                                | 432.349114        | 959.52          | [M + H - C <sub>6</sub> H <sub>10</sub> O <sub>5</sub> ] + 593.397 |                  |
| <b>Octylamine #2</b>                           | <b>130.160446</b> | <b>197.692</b>  | nd                                                                 | <b>3</b>         |
| <b>γ-Glutamyl-β-aminopropionitrile</b>         | <b>217.131869</b> | <b>979.5795</b> | <b>[M + H+NH<sub>3</sub>] + 199.095</b>                            | <b>2</b>         |
|                                                | 158.08417         | 979.5795        | [M + H - COCH <sub>2</sub> ] + 199.095                             |                  |
|                                                | 175.116193        | 979.1165        |                                                                    |                  |
| <b>Phosphatidyl glycerol (PG)</b>              | <b>743.47648</b>  | <b>94.7655</b>  | <b>[M + H] + 742.469</b>                                           | <b>2</b>         |
|                                                | 489.356499        | 95.177          |                                                                    |                  |
|                                                | 563.408467        | 94.7665         | [M + H - H <sub>2</sub> O] + 580.415                               |                  |
|                                                | 581.421819        | 94.7655         | [M + H - C <sub>6</sub> H <sub>10</sub> O <sub>5</sub> ] + 742.469 |                  |
| <b>Diacylglycerol #1</b>                       | <b>609.454387</b> | <b>90.8165</b>  | <b>[M + H] + 608.444</b>                                           | <b>2</b>         |
|                                                | 123.056443        | 90.8435         | [M + K] + 84.0949                                                  |                  |
|                                                | 191.144259        | 90.97           |                                                                    |                  |
|                                                | 318.301504        | 91.8775         |                                                                    |                  |
|                                                | 495.404728        | 90.815          | [M + H] + 494.396                                                  |                  |
|                                                | 517.38243         | 91.8615         | [M + Na] + 494.396                                                 |                  |
|                                                | 597.415776        | 90.8385         | [M + H - C <sub>4</sub> H <sub>8</sub> ] + 652.48                  |                  |
| <b>Unknown guanosine derivative</b>            | <b>312.130152</b> | <b>442.952</b>  | <b>[M + H] + 311.123</b>                                           | <b>3</b>         |
|                                                | 180.089289        | 441.906         | [M + H - C <sub>5</sub> H <sub>8</sub> O <sub>4</sub> ] + 311.123  |                  |
| <b>Glycosyl oleosyl tyrosine tentative</b>     | <b>608.380073</b> | <b>1066.395</b> | <b>[M + H] + 607.373</b>                                           | <b>3</b>         |
|                                                | 446.327061        | 1066.385        | [M + H - C <sub>6</sub> H <sub>10</sub> O <sub>5</sub> ] + 607.373 |                  |
| <b>L-Glutamate</b>                             | <b>148.062283</b> | <b>1144.895</b> | <b>[M + H] + 147.054</b>                                           | <b>1</b>         |
|                                                | 102.056211        | 1144.9          | [M + H - HCOOH] + 147.054                                          |                  |



|                                             |                   |                 |                                                                   |             |
|---------------------------------------------|-------------------|-----------------|-------------------------------------------------------------------|-------------|
|                                             | 130.05145         | 1143.875        | [M + H - H <sub>2</sub> O] + 147.054                              |             |
| <b>Trp/anthranilate-derived alkaloid #1</b> | <b>160.077523</b> | <b>525.4205</b> | nd                                                                | <b>3</b>    |
| Adenine                                     | 136.065707        | 260.995         | nd                                                                | 1           |
| <b>Diacylglycerol #2</b>                    | <b>591.498873</b> | <b>407.5545</b> | <b>[M + H] + 590.493</b>                                          | <b>3</b>    |
|                                             | 97.1001582        | 407.504         |                                                                   |             |
|                                             | 102.890466        | 406.16          |                                                                   |             |
|                                             | 107.381363        | 405.093         |                                                                   |             |
| <b>Unknown oxylipin</b>                     | <b>211.170449</b> | <b>623.9395</b> | <b>[M + H] + 210.165</b>                                          | <b>3</b>    |
|                                             | 174.142194        | 623.9545        |                                                                   |             |
|                                             | 193.160743        | 622.9025        | [M + H - H <sub>2</sub> O] + 210.165                              |             |
| <b>Phosphocholine</b>                       | <b>184.075279</b> | <b>532.2415</b> | nd                                                                | <b>2</b>    |
| <b>Kaempferol</b>                           | <b>287.057627</b> | <b>348.149</b>  | nd                                                                | <b>1, 3</b> |
| <b>Trehalose</b>                            | <b>343.124978</b> | <b>1232.34</b>  | <b>[M + H] + 342.117</b>                                          | <b>2</b>    |
| <b>L-Aspartate</b>                          | <b>134.045489</b> | <b>1264.115</b> | nd                                                                | <b>1</b>    |
| <b>Unknown lignan #1</b>                    | <b>415.214999</b> | <b>53.372</b>   | <b>[M + H] + 414.211</b>                                          | <b>3</b>    |
| <b>Trp/anthranilate-derived alkaloid #2</b> | <b>160.077541</b> | <b>564.5435</b> | nd                                                                | <b>3</b>    |
| L-Tyrosine                                  | 182.083331        | 728.615         | nd                                                                | 1           |
| <b>Methyl-propenyl-ketone fragment</b>      | <b>85.0595623</b> | <b>65.906</b>   | nd                                                                | <b>3</b>    |
| <b>L-Citrulline</b>                         | <b>176.103539</b> | <b>1066.4</b>   | <b>[M + H] + 175.097</b>                                          | <b>2</b>    |
|                                             | 159.07823         | 1067.43         | [M + H - NH <sub>3</sub> ] + 175.097                              |             |
| <b>2-O-methyladenosine</b>                  | <b>282.121178</b> | <b>772.818</b>  | <b>[M + H] + 281.114</b>                                          | <b>2</b>    |
|                                             | 150.079173        | 772.818         | [M + H - C <sub>5</sub> H <sub>8</sub> O <sub>4</sub> ] + 281.114 |             |
| <b>Betalamic acid</b>                       | <b>210.040691</b> | <b>72.512</b>   | <b>[M - H] - 211.048</b>                                          | <b>2</b>    |
|                                             | 166.051461        |                 | [M - H - CO <sub>2</sub> ] - 211.048                              |             |
|                                             | 122.061824        |                 | [M - H - CO <sub>2</sub> ] - 167.059                              |             |
|                                             | 112.986128        |                 | [M - H] - 113.994                                                 |             |
|                                             | 104.051649        |                 | [M - H - H <sub>2</sub> O] - 123.07                               |             |
|                                             | 68.9973087        |                 | [M - H - CO <sub>2</sub> ] - 113.994                              |             |
| <b>Unknown lignan #2</b>                    | <b>415.144229</b> | <b>595.9305</b> | <b>[M - H] - 416.153</b>                                          | <b>3</b>    |
|                                             | 397.134394        |                 | [M - H - H <sub>2</sub> O] - 416.153                              |             |
| <b>Heptaprenyl diphosphate tentative</b>    | <b>675.359228</b> | <b>595.9265</b> | <b>[M - H + Na] -</b>                                             | <b>3</b>    |
|                                             | 653.375205        |                 | [M - H] -                                                         |             |
|                                             | 277.21            |                 |                                                                   |             |
|                                             | 101.029           |                 |                                                                   |             |
| <b>N-Methylanthranilate</b>                 | <b>150.056863</b> | <b>189.953</b>  | nd                                                                | <b>2</b>    |
| <b>Malic acid</b>                           | <b>89.0257836</b> | <b>664.706</b>  | nd                                                                | <b>1</b>    |
| <b>UDP glucose tentative</b>                | <b>565.047354</b> | <b>1328.19</b>  | <b>[M - H] - 566.053</b>                                          | <b>2</b>    |
| <b>Monodiacylglycerol</b>                   | <b>775.536748</b> | <b>176.006</b>  | <b>[M + Na + ACN] -</b>                                           | <b>3</b>    |
|                                             | 712.537           |                 | [M - H] -                                                         |             |
|                                             | 683.3995          |                 |                                                                   |             |
|                                             | 661.419           |                 |                                                                   |             |
|                                             | 550.4766          |                 | [M - Hexose] -                                                    |             |
|                                             | 532.4626          |                 | [M-glucose] -                                                     |             |
| <b>Unknown Carboxylic acid</b>              | <b>310.073376</b> | <b>639.003</b>  | <b>[M - H] -</b>                                                  | <b>3</b>    |
|                                             | 266.083214        |                 | [M - H - CO <sub>2</sub> ] - 311.081                              |             |
| <b>Methanesulfonic acid</b>                 | <b>94.9826702</b> | <b>401.101</b>  | nd                                                                | <b>2</b>    |
| <b>L-Erythrulose</b>                        | <b>119.036098</b> | <b>704.597</b>  | <b>[M - H] -</b>                                                  | <b>2</b>    |
|                                             | 101.025423        |                 | [M - H - H <sub>2</sub> O] -                                      |             |
|                                             | 71.0160475        |                 |                                                                   |             |
|                                             | 59.0163848        |                 |                                                                   |             |
| <b>Glyceric acid</b>                        | <b>105.020724</b> | <b>879.954</b>  | nd                                                                | <b>2</b>    |
|                                             | 75.03             |                 |                                                                   |             |

**Table S5.** Nucleotide sequence of primers used for qRT-PCR analysis.

| Gene         | Name                                                     | Gene Model             | Forward Primer (5'→3')       | Reverse Primer (5'→3')         | Reference                                            |
|--------------|----------------------------------------------------------|------------------------|------------------------------|--------------------------------|------------------------------------------------------|
| <i>DREB2</i> | Dehydration-responsive element-binding protein 2 (DREB2) | Solyc05g05241<br>0.1.1 | GCAAGAGGACTTCCACTT<br>CT     | GCCATGTTGCCAATGCACC<br>AA      | [37]                                                 |
| <i>RAB18</i> | Responsive to ABA 18                                     | Solyc02g08485<br>0.2.1 | CCTGGGATGCATTGAACA<br>CC     | CACGGGACACCATAACACA<br>C       | [38]                                                 |
| <i>NCED1</i> | 9-cis-epoxycarotenoid dioxygenase 1 (NCED1)              | Solyc07g05657<br>0.1.1 | CTTATTTGGCTATCGCTGA<br>ACC   | CCTCCAACCTCAAACCTCATT<br>GC    | [46]                                                 |
| <i>AOC</i>   | Allene oxide cyclase                                     | Solyc02g08573<br>0.2.1 | GCCTCTGCTGCTCTTAGA<br>ACC    | CGAAGATAAGCAGGGCTTC<br>C       | [46]                                                 |
| <i>JA2</i>   | Jasmonic acid 2                                          | Solyc12g01362<br>0.1.1 | GCCCATCCTCCAAATTT<br>CG      | CTACTGCTTGAACCCGAGAT<br>T      | [40]                                                 |
| <i>PR-1a</i> | Pathogenesis-related protein 1a                          | Solyc09g00701<br>0.1.1 | TGGTGGTTCATTTCTTGCA<br>ACTAC | ATCAATCCGATCCACTTATC<br>ATTTTA | [22]                                                 |
| <i>MYC2</i>  | MYC2                                                     | Solyc08g07693<br>0.1.1 | CGGTGTCATCACCTGCTT<br>AT     | TTCGGTGTCCGGTAACTTCTT<br>C     | [21]                                                 |
| <i>Actin</i> | Actin                                                    | Solyc03g07840<br>0.2.1 | CCTCAGCACATTCCAGCA<br>G      | CCACCAAACCTTCTCCATCCC          | Isabel Diaz unpublished results (CBGP, Madrid Spain) |
| <i>EF1a</i>  | Elongation factor 1-alpha                                | Solyc06g00997<br>0.2.1 | GACAGGCGTTCAGGTAA<br>GGA     | GGGTATTCAGCAAAGGTCT<br>C       | [38]                                                 |
